# Supplementary material for: Contrasting Local and Macroscopic Effects of Collagen Hydroxylation
Source: MDPI journal article supplement (doi:10.3390/ijms22169068), 2021-08-23

# Supporting Information: Contrasting local and macroscopic effects of collagen hydroxylation

Sameer Varma,<sup>\*,†</sup> Joseph P.R.O. Orgel,<sup>‡</sup> and Jay D. Schieber<sup>¶</sup>

<sup>†</sup>*Department of Cell Biology, Microbiology and Molecular Biology, Department of Physics,  
University of South Florida, Tampa, FL 33620*

<sup>‡</sup>*Department of Biology, Department of Physics, Department of Biomedical Engineering,  
Illinois Institute of Technology, Chicago, IL-60616*

<sup>¶</sup>*Department of Chemical and Biological Engineering, Department of Physics, Illinois  
Institute of Technology, Chicago, IL-60616*

E-mail: svarma@usf.edu

Figure S1: Time evolution of unit cell dimensions ( $|a|$ ,  $|b|$ ,  $|c|$ ,  $\alpha$ ,  $\beta$  and  $\gamma$ ), total potential energy and dihedral energy of unhydroxylated system.

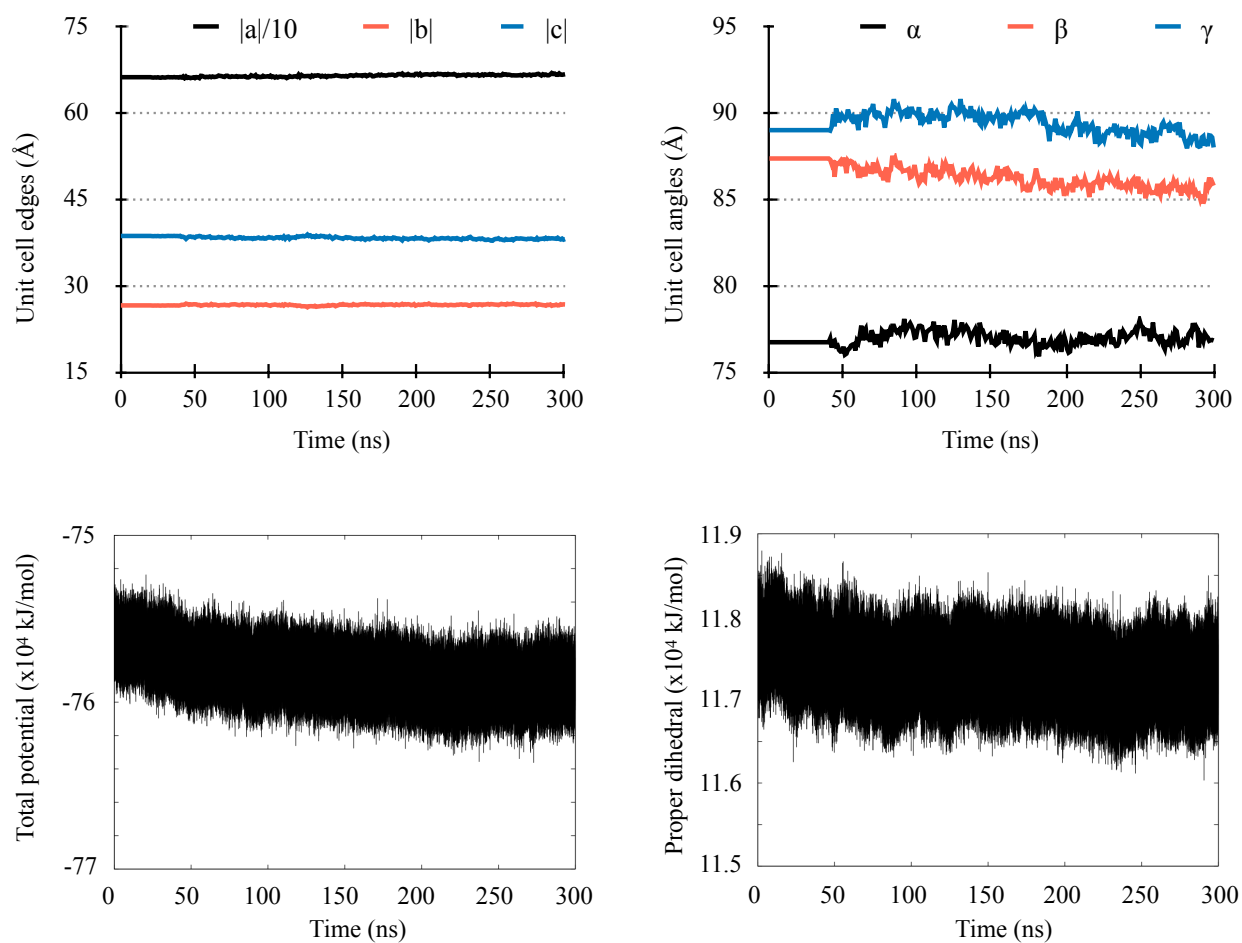

Supplement: s1 [file s1]
